# **Habitat preference of an herbivore shapes the habitat distribution of its host plant**

Nicolas M. Alexandre<sup>1,2,3,†</sup>, Parris T. Humphrey<sup>2,3,4,†</sup>, Joseph Frazier<sup>2</sup>, Andrew D. Gloss<sup>2,3,5</sup>,  
Jimmy Lee<sup>2</sup>, Henry A. Affeldt III<sup>2</sup>, Noah K. Whiteman<sup>1,2,3\*</sup>

<sup>1</sup> Department of Integrative Biology, University of California, Berkeley, CA 94720.

<sup>2</sup> Rocky Mountain Biological Laboratory, Crested Butte, CO 81224.

<sup>3</sup> Department of Ecology & Evolutionary Biology, University of Arizona, Tucson, AZ 85721.

<sup>4</sup> Department of Organismic & Evolutionary Biology, Harvard University, Cambridge, MA  
02138.

<sup>5</sup> Department of Ecology & Evolution, University of Chicago, Chicago, IL 60637.

† *equal contribution.*

\*Author for correspondence: NKW, [whiteman@berkeley.edu](mailto:whiteman@berkeley.edu), phone: +1 520-696-3950

***Running title:*** Herbivore habitat choice shapes herbivory

***Article type:*** Note

***Author contributions:*** NMA, ADG, JL, HAA, and NKW designed the experiments; NMA, ADG, JL, HAA, and JF collected the data; PTH and NMA analyzed the data; NMA, PTH and NKW wrote the paper. All authors contributed to editing the submission.

***Data accessibility:*** All data will be deposited in the Dryad data repository (doi pending).

## Abstract

Habitat distributions of plants are often driven by abiotic factors, but growing evidence suggests an important role for consumers. A textbook example of a plant whose habitat distribution is shaped by consumers is bittercress (*Cardamine cordifolia*). Bittercress is more abundant in shade than in sun habitats, and this is thought to arise because herbivore pressure is lower in the shade. The bittercress case study remains incomplete, as we still do not understand why herbivory is lower in the shade. Herbivores may avoid shaded bittercress because the plants are lower quality, or because herbivores simply prefer brighter, warmer habitats. We tested these alternative hypotheses through a series of herbivore choice experiments. *Scaptomyza nigrita*, a locally abundant specialist and dominant herbivore of bittercress, strongly preferred feeding and laying eggs on bittercress we collected from shade versus sun habitats. Thus, shaded bittercress are more, not less, palatable to these herbivores. Separately, *S. nigrita* strongly preferred feeding and laying eggs on leaves held in treatments that simulated sun rather than shade habitats—regardless of whether leaves came from sun or shade habitats originally. The underlying mechanism for a consumer-driven plant distribution appears to be a simple behavioral preference of herbivores for brighter, warmer habitats.

**Keywords:** *Brassicaceae*, bittercress, *Drosophilidae*, leaf miner, *Scaptomyza*, herbivory.

## Introduction

Habitat distributions of plants are thought to be shaped primarily by abiotic environmental gradients (Whittaker 1967), but there is growing evidence that consumers can have a major impact as well (Maron and Crone 2006). A series of studies in the 1980–90s on bittercress (*Brassicaceae*: *Cardamine cordifolia*) in the Elk Mountains of Colorado were among the first to

explore the role of herbivory in shaping the fine-scale distribution of a plant species (Collinge and Louda 1988, 1990; Louda 1984; Louda and Rodman 1983, 1996), and this system serves as a textbook example of biotic drivers of plant distributions (Ricklefs and Miller 2000). Adult females of *Scaptomyza nigrita* flies (Drosophilidae) are the primary herbivores of bittercress and create feeding punctures in leaves with serrated ovipositors (Collinge and Louda 1988). Their larvae, which form leaf-mines, can defoliate up to 75% of leaf area from bittercress in sun habitats (Collinge and Louda 1988). Louda and Rodman (1996) argued that fitness effects of high herbivory in sun habitats were strong enough to drive bittercress into shade habitats, where herbivory was low. But nearly 30 years later, we still do not understand the causes of differential herbivory across this sun–shade ecotone. Louda and Rodman (1996) proposed two mechanisms to explain this pattern. Plants in sun habitats could be less resistant to herbivores, likely due to water stress, than those in shade habitats. Herbivores were also more abundant and active in sun habitats (Louda and Rodman 1996), leading them to propose as an alternative that these herbivores prefer warmer, brighter habitats (Louda and Rodman 1996). We addressed these alternative hypotheses in order to better understand the factors that drive a textbook case of consumer-driven habitat limitation for a native plant.

Because previous herbivory data were collected nearly 30 years ago (Louda 1988), we first verified that *S. nigrita* herbivory remained higher in sun relative to shade habitats. Second, we tested the plant quality hypothesis by offering *S. nigrita* females a choice between sun- and shade-derived bittercress under laboratory conditions. Finally, we conducted choice trials in laboratory and field settings in which we manipulated the light and temperature environment of plants within choice trials to measure how these abiotic variables impacted *S. nigrita* foraging patterns, using plants collected from both sun and shade habitats. We found that *S. nigrita* prefer

bittercress from the shade, yet their strong attraction to plants held in bright and warm habitats is sufficient to override this preference for shade-derived leaves. Our data lead us to reject the plant quality hypothesis and instead conclude that the habitat preference of this herbivore for brighter, warmer habitats underlies the higher rates of herbivory in sun habitats. Thus, the habitat distribution of bittercress arises from the habitat preferences of its dominant herbivore.

## Materials and Methods

*Herbivory surveys.* All experiments were conducted between 2010 and 2015 at the Rocky Mountain Biological Laboratory (RMBL) in Gothic, CO, USA. In 2011, we conducted field surveys of herbivore damage on bittercress in nine sun habitats (no tree canopy) and nine shade habitats (dense evergreen tree canopy present) (Appendix S1: Fig. S1). Shade and sun sites were interspersed geographically and in elevation and systematically differed in photosynthetically active radiation, % shade cover, and nearby canopy tree size (Appendix S1: Table S1). We recorded adult *S. nigrita* feeding punctures (stipples) and larval mines in two basal leaves from each of ten ramets from the same bittercress patch ( $n=180$  observations per habitat type).

We modeled stipple and mine counts using zero-inflated negative binomial (ZINB) generalized linear models (GLMs). We chose this model because a zero count can arise because local herbivore abundance is too low ('false' zeros, Zuur et al. 2009). These are distinct from the expected proportion of zeros arising from non-truncated count distributions such as Poisson or NB ('true' zeros, Zuur et al. 2009). While all zeros in our dataset are meaningful, we modeled whether a leaf belongs to the putatively un-sampled (i.e. 'false zero') class with probability  $\pi_0$ , as a function of the fixed effects of source habitat (sun vs. shade) and leaf area ( $\text{mm}^2$ ), using the canonical logit link function in a binomial GLM. The count distribution containing the 'true'

zero class [with probability  $(1-\pi_0)$ ] was simultaneously fit under a NB distribution with a log link function, with habitat (sun vs. shade), leaf area, and an arbitrary leaf ID (two-levels) modeled as fixed effects. Coefficients were estimated under maximum likelihood using **R** v3.3.3 (R Core Team 2017) package *pascal* v1.4.9. (Jackman 2015). We further describe our statistical approach in Appendix S3.

*Host choice experiment I: Sun versus shade-derived bittercress.* In 2010 we tested whether *S. nigrita* adult females prefer feeding on individual bittercress derived from sun or shade habitats. We transplanted bittercress plants from the field into soil within plastic pots and placed in the laboratory under fluorescent lighting (16:8 light:dark) for < 24 h. In each of eight replicates, we randomly assigned two shade-derived and two sun-derived bittercress plants to the four corners of a mesh 35.5 x 35.5 x 61 cm cage ([livemonarch.com](http://livemonarch.com)). All leaves were un-mined, and we subtracted pre-existing stipple damage from final counts. In each cage we placed two petri dishes (100 mm diameter) containing 100% recycled paper towels: one moistened with a 5% sucrose solution, and one with tap water. Four, field-collected adult female flies were introduced into each cage and allowed to feed for 24 h, after which stipples and eggs were counted using a dissecting microscope. See Appendix S2: Fig. S1A for a schematic.

To control for differences in plant architecture between sun- and shade-derived bittercress, we conducted a detached leaf assay using cauline leaves clipped from the first or second position from sun or shade habitats. For each of 15 replicate trials, two leaves each from sun and shade plants were inserted by their petioles into a half liter-sized plastic container filled with 1.5 cm of 2% Phytoblend (Caisson Laboratories, Logan, UT). Leaves were randomly assigned to positions for each assay container, which was closed with a mesh lid. We introduced one field-caught adult female fly into each container and allowed it to forage for 24 h, after

which we counted stipples and eggs as above. No flies were used for multiple trials. See Appendix S2: Fig. S1B for a schematic.

For both assays, we modeled stipple and egg counts using NB GLMs with plant habitat (sun vs. shade), number of cauline leaves (for whole-plants), and leaf width (for detached leaves; mm) as fixed effects, and cage ID (i.e. replicate assay) as a random intercept. Coefficients were estimated via maximum likelihood using **R** package *lme4* v1.1-13 (Bates et al. 2015). For comparisons to Poisson and zero-inflated models see Appendix S3.

*Host choice experiment II: Effects of light and temperature.* In 2014 and 2015 we conducted choice experiments to decouple the effects of light and temperature on *S. nigrita* foraging behavior. In 2014, multiple sets of trials were conducted in a temperature-controlled laboratory setting as well as in a field setting. In both settings, we manipulated light levels at one end of large mesh cages (35.5 x 35.5 x 185 cm) and performed choice assays under warmer and cooler air temperatures. For the field trials, we placed two mesh cages lengthwise on the ground in adjacent sun and shade plots at a site at RMBL (Appendix S1: Fig. S1). Each cage was placed under a large wooden picnic table wrapped in reflective Mylar to protect the surface of each mesh cage from sun exposure. Shade cloth (70% opacity) was then used to wrap each cage until ambient light was similar to that of shade habitats as determined by a light meter. Within each cage, we established a light gradient by affixing two LED lights (18–20 lumens, 7000K lights, LX-8058, Gemini, USA) via hooks at 14 and 21 cm from the bottom of one of two 1.25 cm thick plywood boards placed vertically against both far sides of each cage. Both plywood boards had a 20 x 30 cm sheet of aluminum foil affixed to them, which focuses the light beam on detached leaves on the light treatment side. Adult female flies, when placed into the middle of the cage at the start of the experiments, were not within line of sight of the light source. Two data-loggers

were mounted on each board (Thermocron iButton DS1921G, Maxim, USA) to continuously measure temperature in the cages. See Appendix S2: Fig. S3 for a schematic.

At two-day intervals, we conducted six trials using both sun-warmed and shade-cooled cages at once. One side of each cage was randomized to receive the LED light. Ten un-damaged bittercress plants were collected near RMBL from along the Copper Creek Drainage (Appendix S1: Fig. S1) and maintained in pots in the laboratory for  $\leq 4$  d prior to each trial. Four leaves from each of the ten plants were detached at the petiole and randomized to each of four experimental conditions (two cage-level temperature treatments X two light environments per cage). Each group of ten leaves was then placed into petri dishes (100 mm) with petioles wrapped in a moistened 100% recycled paper towel. The two sides of a cage contained ten petri dishes, each with a leaf (Appendix S2: Fig S2). Ten *S. nigrita* adult females were collected near RMBL along the Copper Creek drainage (Appendix S1: Fig. S1) and released into the middle of each cage. Flies foraged for 24 hours starting at 1100 h.

For the six 2014 laboratory choice trials, the same two cages were placed without Mylar-table overheads into temperature-controlled environmental chambers. One cage was placed into each chamber, which was either cooled or held at ambient temperature ( $\sim 16^{\circ}\text{C}$  and  $\sim 21^{\circ}\text{C}$ , respectively; Appendix S4: Fig. S1). Plants, leaves, and flies were collected and utilized as above, except that flies were allowed to feed for 8 hours (1100–1900 h) during each trial. LED and data-logger placement in cages were the same for each cage as in the field trials.

We carried out similar trials in 2015 but in a single environmental chamber at two-day intervals, alternating between two temperatures (approximately  $20^{\circ}\text{C}$  and  $24^{\circ}\text{C}$ ; Appendix S4: Fig. S1). Leaves were obtained from plants in sun and shade habitats along the Copper Creek Drainage near RMBL (Appendix S1: Fig. S1) and were randomized with equal representation of

sun and shade-derived leaves across treatments. Baseline temperatures in 2015 were elevated by 4 °C relative to 2014 (Appendix S4: Fig. S2). In addition to stipples, we counted eggs deposited by foraging *S. nigrita*, which were not counted in 2014 because our experiment began later in the season when adult females were less likely to be gravid.

For all 2014 trials, we modeled stipple and egg counts using NB generalized linear mixed models (GLMMs) with the following fixed effects: leaf width (mm<sup>2</sup>), leaf position along stem from which it was removed (‘position’), light environment (light vs. dark), temperature (warm vs. cool), as well a fixed interaction term between temperature and light environment, which estimates how the effect of light differs depending on temperature. We modeled between-trial, between-room, between-cage, and between-side-of-cage effects as a series of nested random intercept terms. For both years, and for both stipple and egg intensity in 2015, we modeled counts with NB GLMMs using **R** package *lme4*. For 2015 trials, we included plant source habitat (sun vs. shade) as a fixed effect. For all of the statistical models, statistical significance of fixed effects was assessed at the  $p \leq 0.05$  level via asymptotic Wald tests. See Appendix S3 for details.

## Results

*Herbivory surveys.* Bittercress plants in shade habitats had a lower prevalence of stippling (odds ratio [‘OR’] = 0.36 [0.16–0.82 c.i.]) and were less than one tenth as likely to have leaf mines (OR = 0.08 [0.02–0.42 c.i.]) than bittercress in sun habitats (Table 1; Binomial model). Average stippling intensity was over four times higher in sun (rate ratio [‘RR’] = 4.45 [3.6–5.5 c.i.]), and leaf miner damage was over 10 times in sun (RR = 11.5 [3.3–39.3 c.i.]; Table 1, ‘NB model’) than in shade habitats (Fig. 1A, Table 1). Larger leaves were more likely to be damaged and had a higher average stippling and mining intensity (Table 1). Leaf size substantially overlapped



between habitats but was slightly larger on average for shade habitats (Appendix S1: Table S2).

*Host choice experiment I: Sun versus shade-derived bittercress.* In laboratory choice tests, *S. nigrita* female flies strongly preferred feeding and laying eggs on shade-derived bittercress. Sun-derived plants received only a third as much stippling ( $RR = 0.33$  [0.22–0.51 c.i.]), and a quarter as many eggs ( $RR = 0.25$  [0.11–0.55 c.i.]) compared to shade-derived plants (Fig. 1B, Table 1). Results were similar in the detached leaf assay (Appendix S3: Fig. S2, Table 1). Leaf area was not a significant predictor of herbivory in this assay (Table 1).

*Host choice experiment II: Effects of light and temperature.* In the 2014 field trials, stippling intensity was eight times higher on plants under lights compared to those not under lights ( $RR = 7.9$  [2.6–24.5 c.i.]; Fig. 2A, Table 2), and stippling intensity in warmer cages was three times higher than in cooler cages ( $RR = 3.1$  [1.00–9.54 c.i.]; Fig. 2A, Table 2). We detected no effect of a light-by-temperature interaction on stippling intensity (Table 2).

*S. nigrita* exhibited a similarly strong light preference in both 2014 and 2015 laboratory choice trials. Stippling intensity was six times higher in 2014 ( $RR = 6.0$  [1.16–31.06 c.i.]) and eight times higher in 2015 ( $RR = 8.7$  [3.2–23.8 c.i.]) on leaves under lights compared to those not under lights (Fig. 2A, Table 2). No effect of cage temperature was detected for stippling (Table 2). In all models of stippling intensity, simpler models without an interaction term between light and temperature were favored via Akaike’s Information Criterion (AIC; Appendix S3: Tables S5–S6). When 2014 and 2015 were pooled, the results were qualitatively unchanged (Appendix S3: Tables S4,S7).

Egg deposition intensity (measured in 2015 only) was over 30 times higher in leaves under lights than those not under lights ( $RR = 36.5$  [12.5–104.6 c.i.]) and over seven times higher in warmer cages ( $RR = 7.1$  [1.99–25.4 c.i.]) than in cooler cages (Fig. 2B, Table 2).

Overall, the model estimated similar egg laying intensities on leaves under lights at both temperatures (Fig. 2B, Table 2), and the light-by-temperature interaction term reflects that leaves not under lights received more eggs in the warmed cages than in the cooler cages (Fig. 2B). Leaf size positively impacted stippling intensity in 2014, and egg intensity in 2015 (Table 2). Plant source habitat (sun vs. shade) did not significantly impact stippling or egg intensity (Table 2).

## Discussion

We found that herbivory was far higher in bittercress found in sun than in shade habitats (Fig. 1A, Table 1), which is the same pattern found nearly 30 years ago (Louda and Rodman 1996). To address the two alternate hypotheses proposed by Louda and Rodman (1996) to explain this pattern—one plant-centric (plant quality) and one herbivore-centric (herbivore habitat preference)—we conducted a series of choice experiments allowing us to dissect the variables which may be driving this pattern. We found that when given a choice between sun- and shade-derived bittercress in the laboratory, female flies actually preferred bittercress from the shade (Fig. 1B, Table 1). Thus, we did not find support for the hypothesis that herbivory is higher in sun habitats because of higher plant palatability. Given this result, we test the hypothesis that herbivores prefer brighter, warmer sun habitats. Choice tests in the field in which light levels and air temperature were experimentally varied within cages allowed us to disentangle the effects of each variable on herbivore preferences. We consistently found that female flies strongly preferred foraging on leaves under lights compared to those not under lights when allowed to move across light environments within cages (Fig. 2A, Table 2). In addition, stippling intensity was higher in the warmer habitat cages in the field, and egg intensity was higher at warmer temperatures in 2015 laboratory trials (Fig. 2A, Table 2). The fewest eggs were laid on plants

away from lights in cooler cages (Fig. 2B, Table 2). Thus, warmer temperatures and high light levels combine to promote herbivory in sun habitats, releasing bittercress in shade habitats from herbivory.

Lower plant secondary compounds may be one reason *S. nigrita* preferred shade-derived bittercress in our pairwise tests under constant light (Fig. 2A, Table 2; Humphrey et al. 2016). But the preference of *S. nigrita* for sun habitats appears stronger than their preference for shade-derived bittercress. We included leaves sampled from both sun and shade sites in our 2015 habitat choice trials. If host quality were a major driver of habitat specificity of *S. nigrita* damage, we would expect to have observed higher damage levels on shade-derived than sun-derived leaves placed under either light treatment. We detected no such effect (Table 2).

The proximal mechanism behind herbivore habitat choice could be a simple positive phototaxis or thermotaxis. However, phototactic behavior is known to vary among individuals and strains of *Drosophila melanogaster* and may be under active neuronal control (Gorostiza et al. 2016). Given that attraction to light is a genetically labile trait yet persists in *S. nigrita*, we hypothesize that there may be benefits to feeding in warm, sunlit habitats that outweigh any advantages to feeding on the more palatable plants in the shade. However, it is completely unknown if the observed preference of *S. nigrita* for sun habitats is adaptive. Habitat preference could be adaptive due to phenological differences in host plant availability, lower parasitism in the shade, or extended developmental times of larvae in the shade. Insects, as ectotherms, are highly sensitive to the temperature of their environment (Sinclair et al. 2012). Cool temperatures restrict the ability of insects to oviposit on available host plants, even when they are abundant, because the temperature in such areas is too low for flight (Kingsolver 1989). This may explain why insects are often restricted to sunny habitats (Huffaker and Kennett 1959; Kaufman 1968),

areas experiencing sunny weather (Whitman 1987), or areas within a plant exposed to the sun, regardless of plant quality (Casey 1992). It could also be that *S. nigrita* uses visual cues to find bittercress plants—its only known host—and as a result, has a reduced ability to find bittercress growing under shade cover (Wallace 1958, Vernon and Gillespie 1990). Bittercress plants in the shade are less clumped than those in the sun in distribution and often occur as single plants, potentially reducing encounters between *S. nigrita* and their hosts (Landa and Rabinowitz 1983, Finch and Collier 1994). Further studies are required to determine if the light and temperature preferences of *S. nigrita* are adaptive or represent a constraint that limits the habitat distribution of this herbivore. Release of shade bittercress from herbivory could also promote divergence in plant defense strategies and responses to light between bittercress populations in sunlit versus shaded habitats, especially if they differ in flowering time; these questions await future study.

Our study adds to the evidence that herbivory can have a major impact on fine-scale habitat distributions of plants. But even in the best-studied systems (e.g., Bruelheide and Schiedel 1999), the mechanisms driving differential herbivory have been difficult to ascertain. Here, we found a simple habitat preference of a specialist herbivore species for sunnier, warmer habitats in the sub-alpine environment of the Rocky Mountains. Regardless of the adaptive value for the flies, because of the high defoliation potential of larval leaf miners, this herbivore habitat preference may be sufficient to drive bittercress into the shade.

## Acknowledgments

We thank Ian Billick (RMBL), Jennifer Reithel (RMBL), Kailen Mooney (UC-Irvine), Carol Boggs (University of South Carolina), Nick Waser (RMBL), Mary Price (RMBL), Brian Enquist (University of Arizona), and Tom Miller (Rice University) for feedback. Financial support was

provided to N.K.W. by RMBL (Research Fellowships 2010–2013), the National Science Foundation Division of Environmental Biology (NSF DEB-1256758), the John Templeton Foundation (41855) and the National Institute of General Medical Sciences of the National Institutes of Health under Award Number R35GM119816; to P.T.H. by RMBL Graduate Fellowships (2011–2013), the University of Arizona Center for Insect Science, and the NSF (DEB-1309493); to A.D.G. by a NSF Graduate Research Fellowship and a RMBL Graduate Fellowship; and to H.A. and J.F. by RMBL undergraduate research awards.

# **Literature cited**

- Bates, D., M. Mächler, B. Bolker, and S. Walker. 2015. Fitting linear mixed-effects models using *lme4*. Journal of Statistical Software, 67:1–48.
- Bruehlheide, H., and U. Scheidel. 1999. Slug herbivory as a limiting factor for the geographical range of *Arnica montana*. Journal of Ecology 87:839-848.
- Casey, T.M. 1993. Effects of temperature on foraging of caterpillars. *Caterpillars: Ecological and Evolutionary Constraints on Foraging*. Chapman and Hall, New York.
- Collinge, S.K., and S.M. Louda. 1988. Patterns of resource use by a drosophilid (Diptera) leaf miner on a native crucifer. Annals of the Entomological Society of America 81:733-741.
- Collinge, S.K., and S.M. Louda 1989. *Scaptomyza nigrata* Wheeler (Diptera: Drosophilidae), a leaf miner of the native crucifer, *Cardamine cordifolia* A. Gray (Bittercress). Journal of the Kansas Entomological Society 62:1-10.
- Finch, S., and R. Collier. 2000. Host-plant selection by insects—a theory based on 'appropriate/inappropriate landings' by pest insects of cruciferous plants. Entomologia Experimentalis et Applicata 96:91-102.

Gorostiza, E.A., J. Colomb, and B. Brembs. 2016. A decision underlies phototaxis in an insect. Open Biology 6:160229.

Huffaker, C.B. and C.E. Kennett. 1959. A ten-year study of vegetational changes associated with biological control of Klamath weed. Journal of Range Management 12:69–82.

Humphrey, P.T., A.D. Gloss, N.M. Alexandre, M.M. Villalobos, M.R. Fremgen, S.C. Groen, L.N. Meihls, G. Jander, and N.K. Whiteman. 2016. Aversion and attraction to harmful plant secondary compounds jointly shape the foraging ecology of a specialist herbivore. Ecology & Evolution 6:3256-3268.

Jackman, S. 2015. *pscl*: Classes and methods for R developed in the political science computational laboratory, Stanford University. Department of Political Science, Stanford University, Stanford, CA. R package version 1.4.9.

Kingsolver, J.G. 1989. Weather and the population dynamics of insects: integrating physiological and population ecology. Physiological Zoology 2:314.

Landa, K., and D. Rabinowitz. 1983. Relative preference of *Arphia sulphurea* for sparse and common prairie grasses. Ecology 64:392-395.

Louda, S.M., and J. Rodman. 1983. Ecological patterns in the glucosinolate content of a native mustard, *Cardamine cordifolia*, in the Rocky Mountains insect-plant interactions, chemical defense, Colorado. Journal of Chemical Ecology 3:397-422.

Louda, S.M. 1984. Herbivore effect on stature, fruiting, and leaf dynamics of a native crucifer. Ecology 65:1379-1386.

Louda, S.M., and J.E. Rodman. 1996. Insect herbivory as a major factor in the shade distribution of a native crucifer (*Cardamine cordifolia* A. Gray, bittercress). Journal of Ecology 84:229-237.

323 Louda, S. M., P.M. Dixon, and N.J. Huntly.1987. Herbivory in sun versus shade at a natural  
324 meadow-woodland ecotone in the Rocky Mountains. *Plant Ecology* 72:141-149.

325 Louda, S.M. 1990. Predation in the dynamics of seed regeneration. In, *Ecology of Soil Seed*  
326 *Banks* 124: 105-113. Eds. Leck, M.A., T.V. Parker, and R.L. Simpson, Academic Press, Inc.

327 Maron, J.L., and E. Crone. 2006. Herbivory: effects on plant abundance, distribution and  
328 population growth. *Proceedings of the Royal Society, London, Series B: Biological Sciences*  
329 273:2575-2584.

330 R Core Development Team 2017. R: A language and environment for statistical computing. R  
331 Foundation for Statistical Computing.

332 Sinclair, B. J., C. M. Williams, and J.S. Terblanche. 2012. Variation in thermal performance  
333 among insect populations. *Physiological and Biochemical Zoology: Ecological and*  
334 *Evolutionary Approaches* 6:594-606.

335 Vernon, R.S., and D.R. Gillespie.1990. Spectral responsiveness of *Frankliniella occidentalis*  
336 (Thysanoptera: Thripidae) determined by trap catches in greenhouses. *Environmental*  
337 *Entomology* 19:1229-1241.

338 Wallace, G.K. 1958. Some experiments on form perception in the nymphs of the desert locust,  
339 *Schistocerca gregaria*. *Journal of Experimental Biology* 35:765-775.

340 Whittaker, R.H. 1967. Gradient analysis of vegetation. *Biological Reviews* 49:207-264.

341 Whitman, D.W. 1987. Thermoregulation and daily activity patterns in a black desert  
342 grasshopper, *Taeniopoda eques*. *Animal Behavior* 35:1814-1826.

343 Zuur, A., E.N. Ieno, N. Walker, A.A. Saveliev, and G.M. Smith. 2009. *Mixed Effects Models*  
344 *and Extensions in Ecology with R*. Statistics for Biology and Health. Springer  
345 Science+Business Media. ISBN 978-0-387-87458-6.

Table 1: Model coefficient estimates for herbivory field survey and lab choice assay of plants from sun and shade habitats.

| Dataset                           | Model type                           | Coefficient          | Herbivory type    |                   |
|-----------------------------------|--------------------------------------|----------------------|-------------------|-------------------|
|                                   |                                      |                      | Stipples          | Mines             |
| Herbivory survey                  | Binomial <sup>†</sup><br>( $\pi_0$ ) | Constant             | −0.655 (0.486)    | 1.152 (0.884)     |
|                                   |                                      | Site type [sun]      | −1.035** (0.424)  | −2.491*** (0.782) |
|                                   |                                      | Leaf area ( $mm^2$ ) | −0.027* (0.015)   | —                 |
|                                   | NB <sup>‡</sup><br>(count)           | Constant             | 1.223*** (0.129)  | −1.165* (0.648)   |
|                                   |                                      | Site type [sun]      | 1.494*** (0.107)  | 2.438*** (0.629)  |
|                                   |                                      | Leaf area ( $mm^2$ ) | 0.004* (0.002)    | 0.009*** (0.003)  |
|                                   |                                      | Leaf ID              | 0.051 (0.098)     | −0.332** (0.152)  |
|                                   |                                      |                      | Stipples          | Eggs              |
| Choice assay<br>(whole plants)    | NB <sup>‡</sup><br>(count)           | Constant             | 1.777*** (0.393)  | 1.079* (0.476)    |
|                                   |                                      | Leaf position        | −0.179*** (0.035) | −0.432*** (0.075) |
|                                   |                                      | Source type [sun]    | −1.158** (0.404)  | −1.484** (0.470)  |
| Choice assay<br>(detached leaves) | NB <sup>‡</sup><br>(count)           | Constant             | 2.177*** (0.761)  | 0.856 (0.811)     |
|                                   |                                      | Leaf area ( $mm^2$ ) | 0.034 (0.048)     | 0.019 (0.053)     |
|                                   |                                      | Source type [sun]    | −1.743*** (0.286) | −0.567* (0.304)   |

\*  $p < 0.1$ ; \*\*  $p < 0.05$ ; \*\*\*  $p < 0.01$

<sup>†</sup>Coefficients are log odds for Constant; log odds ratios for others.

<sup>‡</sup>Coefficients are log rate for Constant; log rate ratios for others.



Table 2: Coefficient estimates for models of habitat choice assays.

| Year (setting)             | Stipples             |                      |                     | Eggs                 |
|----------------------------|----------------------|----------------------|---------------------|----------------------|
|                            | 2014 (field)         | 2014 (lab)           | 2015 (lab)          | 2015 (lab)           |
| Constant                   | −2.038***<br>(0.603) | −2.514***<br>(0.870) | 0.521<br>(0.885)    | −4.870***<br>(0.824) |
| Leaf width (mm)            | 0.068***<br>(0.012)  | 0.063**<br>(0.026)   | −0.003<br>(0.022)   | 0.054***<br>(0.019)  |
| Plant source [sun]         | —<br>—               | —<br>—               | −0.291<br>(0.702)   | −0.002<br>(0.19)     |
| Light [light]              | 2.072***<br>(0.574)  | 1.792**<br>(0.838)   | 2.145***<br>(0.240) | 3.60***<br>(0.540)   |
| Temp. [warm]               | 1.129**<br>(0.575)   | 0.399<br>(0.885)     | −0.125<br>(0.501)   | 1.960***<br>(0.650)  |
| Light × Temp. [light:warm] | −1.263<br>(0.788)    | 1.123<br>(1.172)     | 0.325<br>(0.870)    | −1.99***<br>(0.630)  |

\* $p < 0.1$ ; \*\* $p < 0.05$ ; \*\*\* $p < 0.01$

*Note:* Coefficients are log rate for Constant; log rate ratios for all others.

# Figure captions

**Fig. 1. Herbivory is higher on bittercress in sun versus shade habitats, but female *S. nigrita* prefer shade-grown bittercress when given a choice.** (A) Herbivory field survey results from sun and shade habitats show higher stipples and mines on bittercress in sun habitats. Raw data points for both stipples and leaf mines are shown in dark gray and are jittered for visual clarity; medians are depicted as black bars, while light gray kernel-smoothed density underlay depicts the distribution of the data. (B) Adult female *S. nigrita* stippled and laid more eggs in bittercress derived from shade versus sun habitats in laboratory choice trials. Plotted are raw leaf-level counts of stipples and eggs on leaves along bittercress stems. Statistical results are presented in Table 1.

**Fig. 2. Female *S. nigrita* stippled (A) and laid more eggs (B) in bittercress leaves in simulated sun compared to shade habitats in field and laboratory choice trials.** The field and laboratory choice trials between light and dark sides of assay cages were conducted at two temperatures (see Appendix S4: Fig. S1 for full temperature profiles), which are indicated below each sub-plot. Eggs were counted only for laboratory trials conducted in 2015 (see Materials & Methods). Plot features are depicted as in Fig. 1. Statistical results are presented in Table 2.

**Figures**

**Fig. 1**

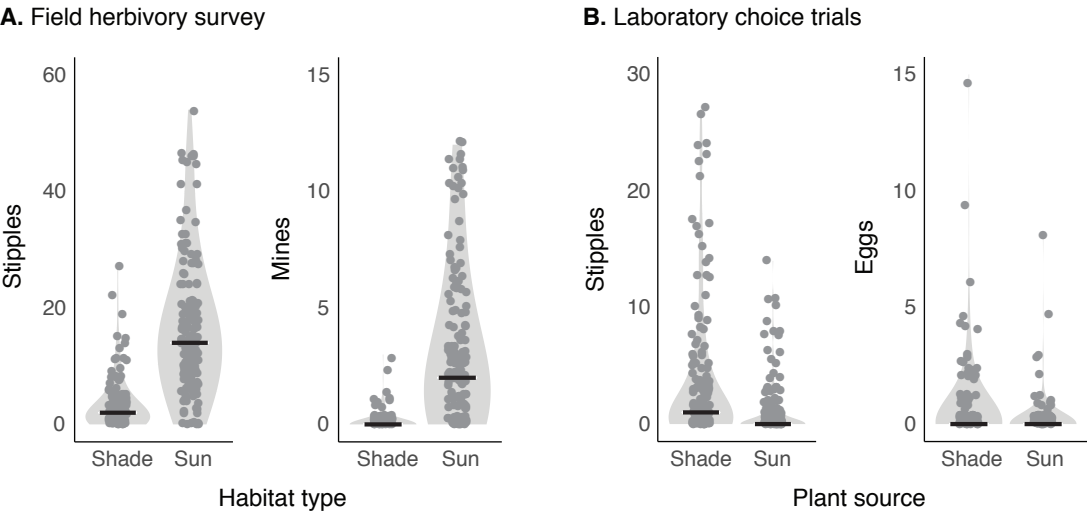

**Fig. 2**

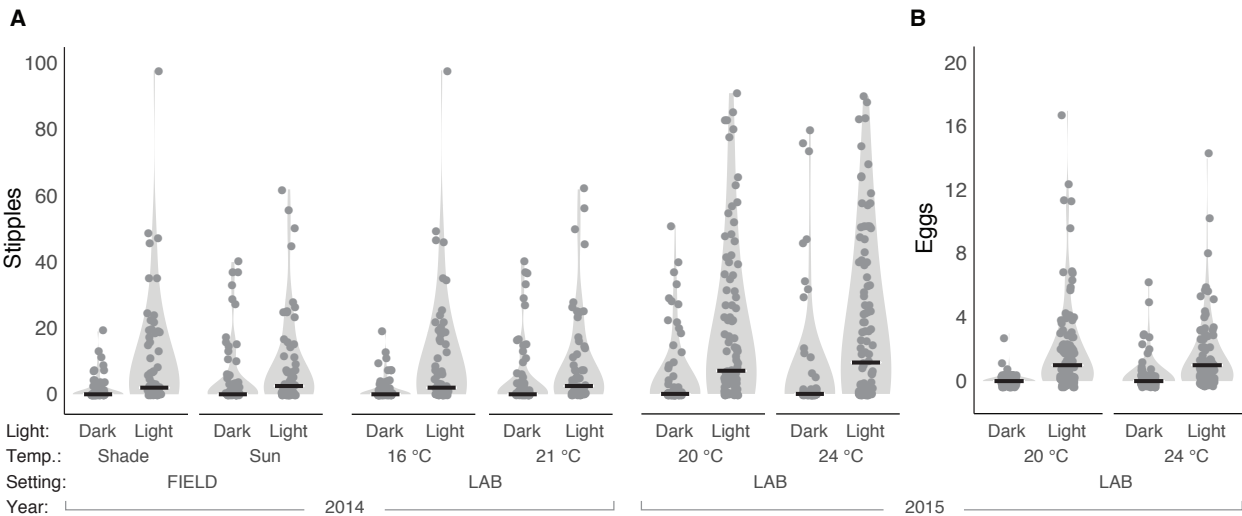

# **Appendix S1.** Characteristics of source locations for bittercress herbivory survey.

At each site, we recorded leaf area of all sampled leaves, photosynthetically active radiation (PAR) using a light meter (Spectrum Technologies, Inc.), percent canopy cover using a densiometer, diameter at breast height (*dbh*) of the four largest trees within four meters, and latitude, longitude, and elevation using a GPS unit (Garmin) (Table S1). Environmental variables at each site were compared using one-way ANOVAs. Sun habitats had higher average PAR and % open canopy than shade habitats (both  $p < 0.001$ ) and did not systematically differ in elevation ( $p > 0.8$ , Table S2).

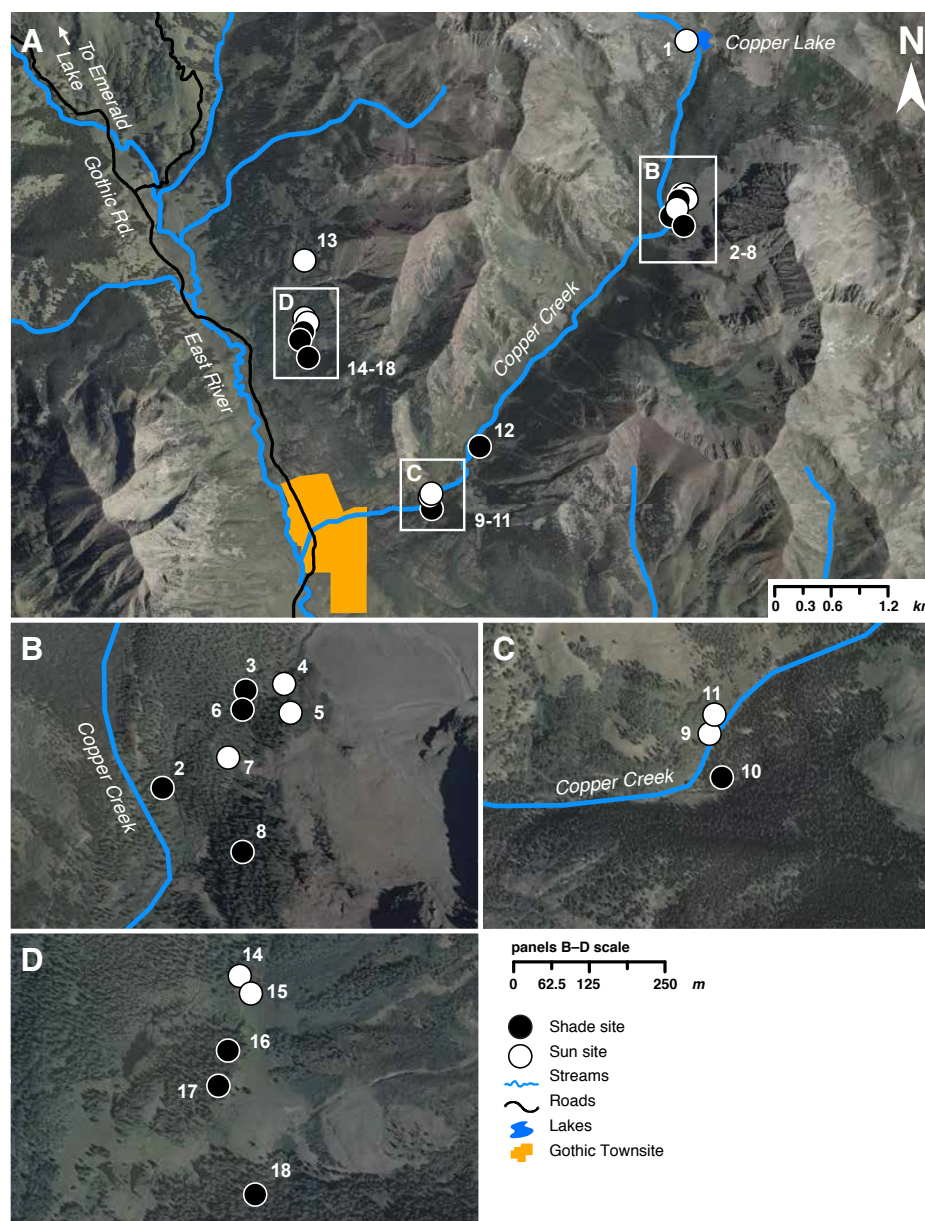

**Fig. S1.** Map of source sites used in the herbivory surveys in the East River Valley and Copper Creek drainages, near the RMBL in Gothic, CO. **A.** Base map showing all sites within region (1:48,000). **B–D.** Maps showing detail of site locations (all same scale, 1:7500).

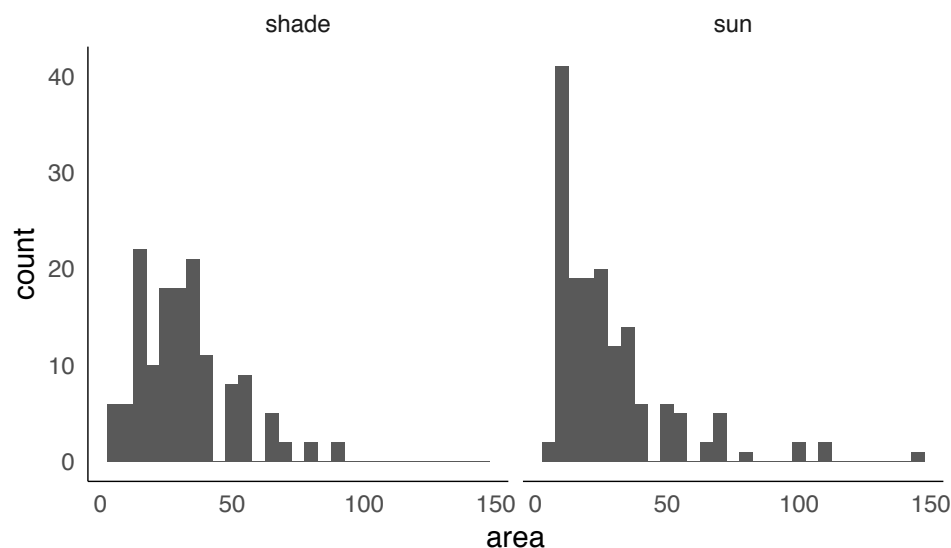

**Fig. S2. Distribution of bittercress leaf area observed across all shade and sun habitats.**

**Table S1. Attributes of sites used for herbivory survey.**

| Site # | Date sampled | Lat.             | Long.             | Elevation (m) | Soil Moisture | Light Environment | PAR ( $\mu\text{mol}\cdot\text{s}\cdot\text{m}^{-2}$ ) <sup>1</sup> | % Canopy Open | Average DBH (cm) |
|--------|--------------|------------------|-------------------|---------------|---------------|-------------------|---------------------------------------------------------------------|---------------|------------------|
| 1      | 10-Jul-11    | 39.0050602776535 | -106.943317166893 | 3461          | Very Wet      | Sun               | 1980                                                                | 99.84         | 0                |
| 2      | 10-Jul-11    | 38.9885304491745 | -106.945774321867 | 3218          | Moist Loamy   | Shade             | 300                                                                 | 6.76          | 10               |
| 3      | 11-Jul-11    | 38.9900162385746 | -106.944210201638 | 3240          | Moist Loamy   | Shade             | 130                                                                 | 8.06          | 121.75           |
| 4      | 11-Jul-11    | 38.9900829890862 | -106.943450029132 | 3253          | Very Wet      | Sun               | 2030                                                                | 82.94         | 0                |
| 5      | 11-Jul-11    | 38.9896982273227 | -106.9432894133   | 3261          | Very Wet      | Sun               | 2034                                                                | 95.42         | 0                |
| 6      | 11-Jul-11    | 38.9897805369006 | -106.94429611421  | 3244          | Moist Loamy   | Shade             | 130                                                                 | 4.16          | 83.25            |
| 7      | 11-Jul-11    | 38.9890385630266 | -106.944483622637 | 3220          | Very Wet      | Sun               | 2134                                                                | 99.84         | 0                |
| 8      | 11-Jul-11    | 38.9876108211294 | -106.944190554921 | 3250          | Moist Loamy   | Shade             | 28                                                                  | 3.38          | 81.75            |
| 9      | 12-Jul-11    | 38.9607056556777 | -106.973679741745 | 3023          | Very Wet      | Sun               | 2026                                                                | 88.14         | 0                |
| 10     | 12-Jul-11    | 38.9600423351315 | -106.973476684125 | 3013          | Wet Loamy     | Shade             | 35                                                                  | 5.72          | 72.25            |
| 11     | 12-Jul-11    | 38.9609507737634 | -106.973571138078 | 3994          | Very Wet      | Sun               | 1933                                                                | 86.84         | 0                |
| 12     | 12-Jul-11    | 38.9655594715881 | -106.968516958823 | 3994          | Very Wet      | Shade             | 32                                                                  | 3.9           | 101              |
| 13     | 13-Jul-11    | 38.9828665210329 | -106.989822099201 | 4058          | Very Wet      | Sun               | 1780                                                                | 96.2          | 0                |
| 14     | 13-Jul-11    | 38.9774145794955 | -106.98986568487  | 4082          | Very Wet      | Sun               | 1870                                                                | 88.4          | 0                |
| 15     | 13-Jul-11    | 38.9771831850899 | -106.989697600334 | 4057          | Very Wet      | Sun               | 1850                                                                | 99.84         | 0                |
| 16     | 13-Jul-11    | 38.976356744414  | -106.990078474138 | 4052          | Very Wet      | Shade             | 54                                                                  | 4.68          | 98               |
| 17     | 13-Jul-11    | 38.975757817399  | -106.990327194402 | 4046          | Moist Loamy   | Shade             | 60                                                                  | 4.16          | 140.5            |
| 18     | 13-Jul-11    | 38.974195183581  | -106.989498527449 | 4051          | Very Wet      | Shade             | 40                                                                  | 7.28          | 78.75            |

<sup>1</sup> Light meter was positioned above the center of each source collection plot, at times without cloud cover between 1:00 pm and 3:00 pm during the week of July 17, 2011.

**Table S2.** Environmental attributes of sun and shade sites where herbivory survey was conducted

| <i>Site attributes</i>                                      | Sun Sites<br>(N = 9) |      | Shade sites<br>(N = 9) |      | ANOVA    |             |
|-------------------------------------------------------------|----------------------|------|------------------------|------|----------|-------------|
|                                                             | $\mu$                | se   | $\mu$                  | se   | <i>F</i> | <i>P</i>    |
| PAR ( $\mu\text{mol}\cdot\text{s}^{-1}\cdot\text{m}^{-2}$ ) | 1959.7               | 37.0 | 89.0                   | 29.4 | 1564     | $<10^{-10}$ |
| % Canopy Open                                               | 93.1                 | 2.2  | 5.3                    | 0.6  | 1527     | $<10^{-10}$ |
| DBH (cm)                                                    | 0.00                 | 0.00 | 87.5                   | 12.2 | 51.77    | $<10^{-10}$ |
| Elevation (m)                                               | 3601                 | 146  | 3568                   | 150  | 0.025    | 0.875       |

  

| <i>Sample attributes</i> | Sun leaves<br>(N = 157) |      | Shade leaves<br>(N = 140) |      | ANOVA    |          |
|--------------------------|-------------------------|------|---------------------------|------|----------|----------|
|                          | $\mu$                   | se   | $\mu$                     | se   | <i>F</i> | <i>P</i> |
| Leaf size (mm)           | 4.98                    | 0.15 | 5.47                      | 0.13 | 5.95     | 0.015    |

## Appendix S2: Design schematics for choice experiments.

**A.** Whole-plant choice assay.

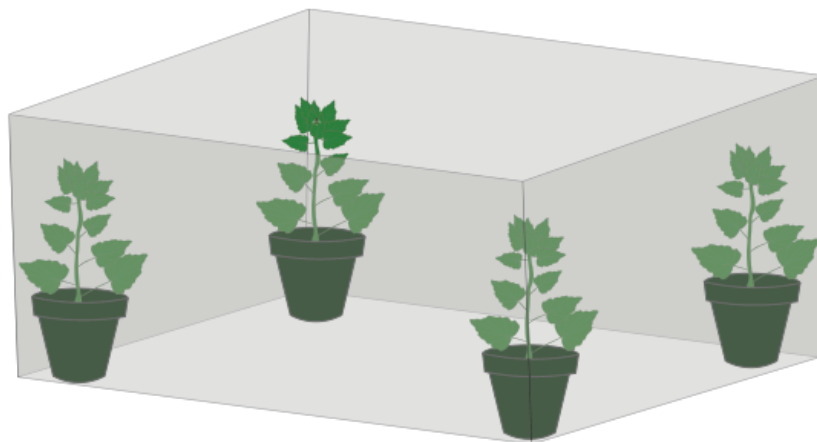

**B.** Detached leaf choice assay.

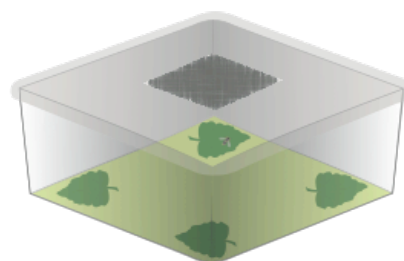

**Fig. S1. Schematic of experimental design for Host choice experiment I: Sun versus shade-derived bittercress.** (A) Whole-plant assay depicted (eight replicate trials were conducted; see Materials & Methods, main text). (B) Detached leaf assay (fifteen replicate trials were conducted; see Materials & Methods, main text).



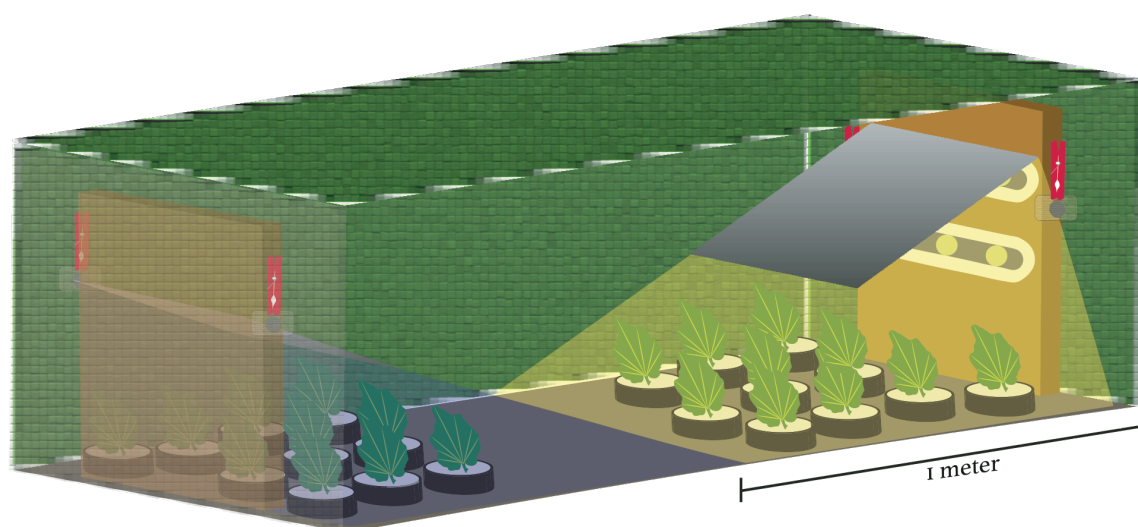

**Fig. S2. Schematic of experimental design for Host choice experiment II: Effects of light and temperature.**

## Appendix 3: Statistical Supplement

### Contents

|          |                                                                       |          |
|----------|-----------------------------------------------------------------------|----------|
| <b>1</b> | <b>Herbivory survey</b>                                               | <b>1</b> |
| 1.1      | Modeling the host selection process . . . . .                         | 2        |
| 1.2      | Modeling the damage intensity process . . . . .                       | 4        |
| 1.3      | Model comparisons . . . . .                                           | 5        |
| <b>2</b> | <b>Herbivore choice tests I: Sun versus shade derived bittercress</b> | <b>7</b> |
| 2.1      | Models for choice experiments . . . . .                               | 7        |
| <b>3</b> | <b>Herbivore choice tests II: Effects of light and temperature.</b>   | <b>8</b> |
| 3.1      | 2014 Trials . . . . .                                                 | 9        |
| 3.2      | 2015 Trials . . . . .                                                 | 9        |
| 3.3      | Combined 2014-2015 Analysis . . . . .                                 | 10       |
| 3.4      | Model Selection . . . . .                                             | 10       |

### 1 Herbivory survey

Herbivore damage from *Scaptomyza nigrita* on its host plant, *Cardamine cordifolia* arises from a sequence of contingent events: (i) the arrival by an herbivore, usually a female, at a host plant (or leaf), and (ii) the damage that results from acceptance of such a host by an adult female or a larva. The former process can be modeled as the probability that an herbivore arrives at a plant (prevalence), while the latter captures the probability that the resulting damage is of a particular extent (intensity). We model each of these steps explicitly by considering herbivore damage count data as a mixture of these two processes in a way that is directly compatible with standard generalized linear regression

approaches. Specifically, herbivore damage (in this case, counts of feeding punctures made by adult females [‘stipples’], leaf mines made by larvae, and eggs laid by adult females) is always recorded as positive integer counts, and such count data typically exhibit under-dispersion (i.e. ‘zero-inflation’), over-dispersion (‘excess variance’), or both, with respect to expectations of Poisson or Poisson–Gamma mixture (i.e. negative binomial, ‘NB’, models).

Our understanding of the foraging ecology of *S. nigrita* leads us to expect that dispersion of both of these types is plausible. Female flies are choosy, often visiting several leaves before making feeding punctures; females may also avoid leaves entirely, either actively or due to stochasticity in the host sampling process, or to differences in local abundances of foraging *S. nigrita*. Once a host has been preliminarily accepted, we expect that variation in the intensity of feeding damage arises from factors perceived subsequent to the initiation of damage. We thus assume that separate (but potentially related) biological processes govern the host acceptance vs. the host damage stages of herbivory as measured in our study.

Figure 1 shows the distribution of stipple and mine counts from our herbivory survey, broken down by habitat type.

## 1.1 Modeling the host selection process

Practically, our herbivore survey data contain both an excess of zeros as well as an over-dispersed count distribution relative to expectations of a Poisson error model. This makes zero-inflated count models a natural choice [10], which are mixture models composed of a binomial component that models the zero-inflation, and a count component (typically Poisson or negative binomial). In our case, a simplest example of the binomial component of such a mixture model assumes that the number of damaged leaves  $y_i$  in group  $i$  of size  $n_i$ , each with probability  $p_i$ , is a realization of a binomially distributed random variable  $Y_i$ :

$$Y_i \sim B(n_i, p_i)$$

In the context of a zero-inflated GLM, it is not  $p_i$  that is estimated but rather  $1 - p_i$ , or the probability of zero (i.e. failure), which we define as  $\pi_0$ . Thus, our expression for the binomial probability distribution of  $y$  zeros, dropping the  $i$  subscript, is

$$Pr\{Y(0) = y\} = \binom{n}{y} \pi_0^y (1 - \pi)^{n-y} \quad (1)$$

To describe the influence of habitat type and leaf area on  $\pi_{0,i}$  we construct a binomial GLM which estimates the linear effects of habitat and leaf area on the logit of  $\pi_{0,i}$  (i.e. the log odds), which we call  $\eta_i$ :

$$\text{logit}(\pi_{0,i}) = \log\left(\frac{\pi_{0,i}}{1 - \pi_{0,i}}\right) = \eta_i$$

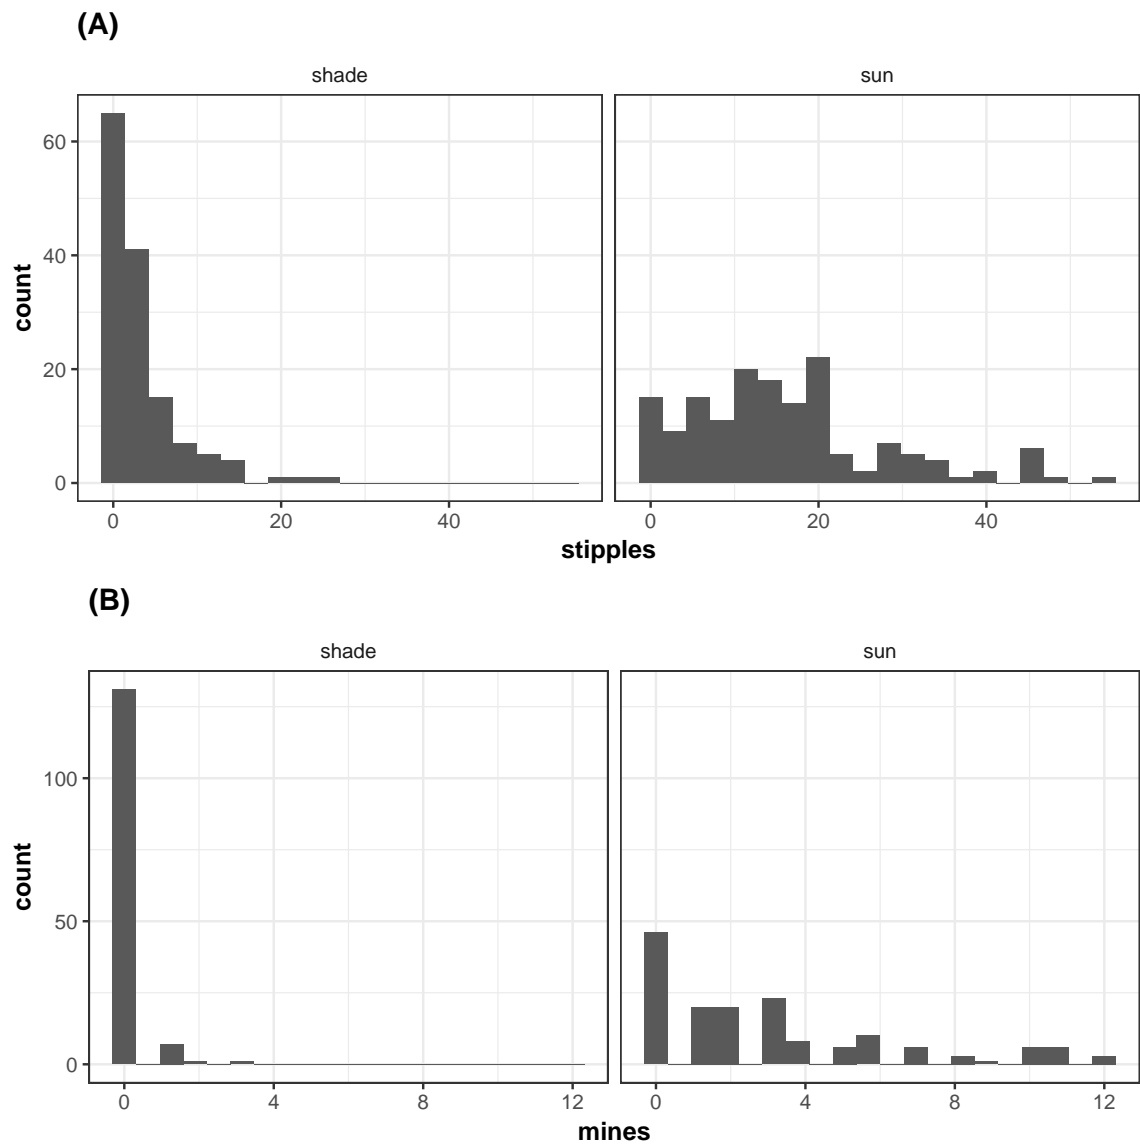

Figure 1: Distribution of (A) stippling and (B) leaf miner damage on sun and shade-grown bitter-cress.

Our binomial GLM for stipple abundance takes on the following linear expression for  $\eta_i$ :

$$\eta_i = \begin{cases} \alpha_0 + \beta x_i, & \text{if habitat = shade.} \\ \alpha_0 + \alpha_1 + \beta x_i, & \text{if habitat = sun.} \end{cases} \quad (2)$$

where  $\alpha_0$  is the coefficient for the shade habitat, taken as the reference level (i.e. the 'Constant' or intercept), to which the effect of the sun habitat ( $\alpha_1$ ) is added;  $\beta$  captures the effect of the area of each leaf ( $x_i$ ).

In Table 1 of the main text, we report the values of the coefficients  $\alpha_0$  as log odds (the Constant), and  $\alpha_1$ , and  $\beta$  as log odds ratios for the factor levels listed in the table. In the Results section of the main text, for ease of interpretation, we report the exponentiated coefficients (e.g.  $\exp[\alpha_0]$ ) to communicate risk of herbivory in terms of odds ( $\frac{\pi_i}{1-\pi_i}$ ) and odds ratios (ORs); we also discuss differences between habitats in terms of the probability of zero counts,  $\pi$ , calculated as:

$$\pi_i = \text{logit}^{-1}(\eta_i) = \frac{e^{\eta_i}}{1 + e^{\eta_i}}$$

Linear estimators ( $\hat{\eta}_i$ ) were generated by maximum likelihood fits of coefficients, as well as the standard error of each coefficient estimate, using **R** [7] package *pscl* [3, 9, 5] using function `zeroinfl`, which jointly estimates these parameters along with those for the count process (see below). Model code in **R** syntax is presented in section 1.3 below.

## 1.2 Modeling the damage intensity process

We model counts of herbivore damage (stipples and leaf mines) as a Poisson random variable ( $Y_i$ ) where the Poisson mean ( $\Theta_i$ ) is itself a random variable, which gives rise to the following expression for the conditional probability of  $Y_i$  given  $\Theta_i$ :

$$Pr\{Y_i = y_i | \Theta_i = \theta_i\} = \begin{cases} \pi_{0,i} + e^{-\theta_i}, & \text{if } y_i = 0. \\ (1 - \pi_{0,i}) \cdot \frac{\theta_i^{y_i}}{y_i!} e^{-\theta_i}, & \text{if } y_i > 0. \end{cases} \quad (3)$$

Conceptually, this means that the variance of our random variable  $Y$  includes the Poisson variance associated with each Poisson mean  $\Theta$  as well as additional variance in the distribution of  $\theta$  itself. We adopt the conventional probability density function for  $\theta$  as a Gamma distribution with scale parameter  $\alpha$  and rate parameter  $\beta$  [10]:

$$g(\theta) = \frac{\alpha^\beta}{\Gamma(\beta)} \theta^{\beta-1} \cdot e^{-\alpha\theta}$$

We recover the the unconditional probability of  $Y_i$  by integrating out the  $\theta$  (i.e. the variable Poisson mean) to recover the parameterization of the negative binomial (NB) that we will use [10]:

$$\begin{aligned} Pr\{Y_i = y_i\} &= \int_0^\infty Pr\{Y_i = y_i | \Theta_i = \theta_i\} \cdot g(\theta) \cdot d\theta \\ &= \frac{\Gamma(\alpha + y_i)}{y_i! \Gamma(\alpha)} \cdot \left(\frac{\mu_i}{\mu_i + \beta}\right)^{y_i} \left(\frac{\beta}{\beta + \mu_i}\right)^\beta \end{aligned} \quad (4)$$

Note that the mean of  $g(\theta)$  is  $\frac{\alpha}{\beta}$  and its variance is  $\frac{\alpha}{\beta^2}$ . Setting  $\alpha = \beta = r$  allows us to re-write the mean as equal to 1 and the variance  $\sigma^2$  as  $\frac{1}{r}$ . This gives the expectation of  $Y_i$  equal to  $\mu_i$  and the variance equal to  $\mu + \sigma^2 \mu^2$ . Thus, the 'dispersion parameter' of the NB,  $\sigma^2$  (or alternatively,  $\frac{1}{r}$ ), can be interpreted as the variance of the Gamma distribution from which the Poisson means ( $\theta_i$ ) are drawn. When  $\sigma^2 \rightarrow 0$  the negative binomial collapses to the Poisson, where  $E[Y_i] = \text{Var}[Y_i] = \mu_i$ . Note that the  $\mu_i$  of the NB is not equivalent to the  $\frac{\alpha}{\beta}$  from the Gamma distribution.

When combined with the binomial probability of zero ( $\pi_i$ ), the full expression for the unconditional probability of  $Y_i$  becomes (using the  $\sigma^2 = \frac{1}{r}$  parameterization to be consistent with **R**):

$$Pr\{Y_i = y_i\} = \begin{cases} \pi_{0,i} + (1 - \pi_{0,i}) \cdot \left(\frac{r}{r + \mu_i}\right)^r, & \text{if } y_i = 0. \\ (1 - \pi_{0,i}) \cdot \frac{\Gamma(r + y_i)}{y_i! \Gamma(r)} \cdot \left(\frac{\mu_i}{\mu_i + r}\right)^{y_i} \left(\frac{r}{r + \mu_i}\right)^r, & \text{if } y_i > 0. \end{cases} \quad (5)$$

Thus,  $Pr\{Y_i\}$  depends on the three parameters,  $\pi_0$ ,  $\mu$ , and  $r$ . In our zero-inflated negative binomial (ZINB) GLM framework, the mean of the NB  $\mu_i$  for each group  $i$  is modeled, via the log link function, as a linear function of our predictor variables. Thus, we model  $\log(\mu_i)$  as a function of bittercress habitat, leaf area, as well as an additional 'structural' fixed effect, the arbitrary leaf ID (levels A or B):

$$\log(\mu_i) = \begin{cases} \alpha_0 + \beta x_i + \gamma_i, & \text{if habitat = shade.} \\ \alpha_0 + \alpha_1 + \beta x_i + \gamma_i, & \text{if habitat = sun.} \end{cases} \quad (6)$$

Here,  $\alpha_1$  indicates the fixed effect of the sun habitat type;  $\gamma_i$  represents leaf ID, which has two levels (arbitrarily 'A' and 'B'). We set  $\gamma_1$  to 0 because the reference level of this factor is embedded in the Constant ( $\alpha_0$ );  $\beta$  captures the effect of leaf position along the stem ( $x_i$ ). In the main text, we report model coefficient estimates corresponding to each level of  $\alpha_i$  and the single  $\beta$  term for the stipple model. The residual error term is implied.

### 1.3 Model comparisons

To justify our use of a ZINB model for the herbivory survey data, we constructed ZI-Poisson models and the non-ZI versions of both NB and Poisson models and compared model fits. For stipple data,

all GLMs contained the same terms (Eq. 2, both with logit link functions; Eq. 6 for count models, both with log link function). The same was true for the leaf mine models, but we removed the leaf area term ( $\beta$ ) from the binomial component because its inclusion increased overall model AIC by 1.95. In contrast, for the ZINB stipple models, adding leaf area to the binomial component reduced AIC by  $> 2.5$  points and was thus retained. In table S2 below and in Table 1 in the main text, we report the leaf mine model results without the leaf area term.

We compared non-nested models (Poisson, NB-only, ZIP, ZINB) using an analog of the likelihood ratio test (Vuong test) as implemented in **R** package `pscl` [5]. This test calculates  $p_i = \hat{P}r(y_i|M_1)$ , the predicted probabilities of each data point from model 1, evaluated under the maximum likelihood estimates of the coefficients, as well as  $q_i$ , the corresponding probabilities from model 2. The Vuong (Z) statistic is  $Z = \sqrt{N}\bar{m}/\sigma_m$  where  $m_i = \log(p_i) - \log(q_i)$  and  $\sigma_m$  is the sample standard deviation of  $m_i$ . P-value of the Vuong test is taken as the  $Z < \alpha$ ,  $Z > (1 - \alpha)$  quantile of the standard Normal distribution; here, and throughout this study, we use  $\alpha = 0.05$ . We report a version of  $Z$  which scales  $\bar{m}$  according to an AICc finite sample size correction [5]. Tables 1 and 2 show coefficient estimates for stipples and leaf mines (respectively) for each of the four candidate models, as well as their log likelihoods and AIC scores.

Table S1: GLM comparisons for **stipple** counts from herbivory survey.

| Model type                 | Coefficient                      | Model               |                   |                     |                   |
|----------------------------|----------------------------------|---------------------|-------------------|---------------------|-------------------|
|                            |                                  | Poisson             | NB                | ZIP                 | ZINB              |
| Count model ( $\mu_i$ )    | Constant ( $\alpha_0$ )          | 1.00***<br>(0.06)   | 0.92***<br>(0.14) | 1.36***<br>(0.06)   | 1.22***<br>(0.13) |
|                            | Leaf area ( $\beta$ )            | 0.005***<br>(0.001) | 0.007*<br>(0.003) | 0.003***<br>(0.001) | 0.004<br>(0.002)  |
|                            | Habitat [sun] ( $\alpha_1$ )     | 1.60***<br>(0.05)   | 1.63***<br>(0.12) | 1.39***<br>(0.05)   | 1.49***<br>(0.11) |
| Binomial model ( $\pi_i$ ) | Constant ( $\alpha_0$ )          |                     |                   | -0.37<br>(0.36)     | -0.66<br>(0.49)   |
|                            | Leaf area ( $mm^2$ ) ( $\beta$ ) |                     |                   | -0.02*<br>(0.01)    | -0.03<br>(0.02)   |
|                            | Habitat [sun] ( $\alpha_1$ )     |                     |                   | -1.35***<br>(0.35)  | -1.04*<br>(0.42)  |
|                            | AIC                              | 2999.90             | 1847.35           | 2490.04             | 1820.66           |
|                            | Log Likelihood                   | -1495.95            | -918.68           | -1238.02            | -902.33           |

\*\*\* $p < 0.001$ , \*\* $p < 0.01$ , \* $p < 0.05$

Notice that the coefficient estimates are largely similar for both ZINB and NB-only models, while both Poisson family models are far worse fits to the data, indicated by the very large  $\Delta$ AIC between these and the NB models (Tables S1-S2). Overall, the ZINB model has the lowest AIC ( $\Delta$ AIC  $> -20$  between ZINB and NB-only models). Comparing the ZINB model to the NB-only model gave an AIC-corrected Vuong statistic of  $Z = 2.45$  ( $p < 0.01$ ) for stipples and  $Z = 1.41$  ( $p = 0.07$ ) for leaf mines;  $Z$  values were well above 5 when ZINB models were compared to ZIP or Poisson models (all  $p < 0.001$ ). Full **R** code for all figures, models, and calculations can be found in the Dryad data repository (doi pending).

Table S2: GLM comparisons for **larval leaf mine** counts from herbivory survey.

| Model type                 | Coefficient                      | Model               |                    |                     |                     |
|----------------------------|----------------------------------|---------------------|--------------------|---------------------|---------------------|
|                            |                                  | Poisson             | NB                 | ZIP                 | ZINB                |
| Count model ( $\mu_i$ )    | Constant ( $\alpha_0$ )          | -2.60***<br>(0.30)  | -2.65***<br>(0.34) | -0.82<br>(0.56)     | -1.19<br>(0.67)     |
|                            | Leaf area ( $mm^2$ ) ( $\beta$ ) | 0.006***<br>(0.002) | 0.009*<br>(0.004)  | 0.008***<br>(0.002) | 0.009**<br>(0.0003) |
|                            | Habitat [sun] ( $\alpha_1$ )     | 3.61***<br>(0.29)   | 3.64***<br>(0.32)  | 2.19***<br>(0.56)   | 2.46***<br>(0.65)   |
| Binomial model ( $\pi_i$ ) | Constant ( $\alpha_0$ )          |                     |                    | 1.65*<br>(0.71)     | 1.24<br>(0.75)      |
|                            | Habitat [sun] ( $\alpha_1$ )     |                     |                    | -2.57***<br>(0.67)  | -2.44**<br>(0.63)   |
|                            | AIC                              | 1003.99             | 802.94             | 839.12              | 792.92              |
|                            | Log Likelihood                   | -497.99             | -396.47            | -412.56             | -389.46             |

\*\*\* $p < 0.001$ , \*\* $p < 0.01$ , \* $p < 0.05$

## 2 Herbivore choice tests I: Sun versus shade derived bittercress

### 2.1 Models for choice experiments

Using NB generalized linear mixed models (GLMMs), we model variation in stipple and egg counts on plants arising from source habitat (sun versus shade) and leaf attributes (as fixed effects), as well as 'structural' random effects of plant ID nested within cage ID (i.e. replicate) to capture experimental design constraints that determine the level of independence among datapoints. Our mixed model for stipple and eggs counts, for both the whole-plant and detached leaf assays, takes the following form:

$$\log(\mu_{ijk}) = \begin{cases} \alpha_0 + \beta x_i + \gamma_{(jk)} + \gamma_k, & \text{if habitat = shade.} \\ \alpha_0 + \alpha_1 + \beta x_i + \gamma_{(jk)} + \gamma_k, & \text{if habitat = sun.} \end{cases} \quad (7)$$

In this model,  $\mu_{ijk}$  is the estimate for each leaf  $i$ ,  $\alpha_0$  and  $\alpha_1$  are as in Eqn. 6, and  $\beta$  is leaf position along stem (low to high) for the whole-plant model or leaf area ( $mm^2$ ) for the detached leaf assay; finally,  $\gamma_k$  represents a random effect of cage ID ( $k$ ) and  $\gamma_{(jk)}$  represents a random effect for plant ID  $j$  nested within each level of cage ID  $k$ ;  $\gamma_j \sim N(0, \sigma_1^2)$  and  $\gamma_{(jk)} \sim N(0, \sigma_2^2)$ .

In our assay cages, we assume that adult females *S. nigrita* flies had sufficient time to potentially visit all available plant tissue; thus, *a priori* we favor using NB-only compared to ZINB models; we do not consider Poisson models further in this analysis on the basis of far worse model fits observed for stipple and leaf mine data, above. We directly compared NB-only models to a ZINB version to justify this approach. We found that adding a ZI term did not improved model fit for stipples ( $\Delta AIC = 1.24$ ) nor for eggs ( $\Delta AIC = 1.94$ ). For the detached leaf assay, the ZINB model was also



a marginally worse fit for both stipples ( $\Delta AIC = 2$ ) and eggs ( $\Delta AIC = 1.77$ ) as well (all  $\Delta AIC$  are ZINB – NB; Table S3).  $P$ -values for Vuong tests between NB and ZINB models were all  $> 0.1$ .

ZINB and NB mixed models were fit using R package `glmmADMB` with the NB parameterization described in section 1 [2, 8]. `glmmADMB` handles ZI mixed models by fitting a single constant  $\pi_0$  term across all groups, rather than a  $\pi_{0,i}$  for each designated group, making it less flexible than the ZINB implementation in package `pscl`; however, `glmmADMB` handles NB and ZINB mixed models, making it appropriate for fitting models with random effects. Coefficient estimates for NB and ZINB models for stipple and egg counts were very similar for both assay types (Table S3); in the main text, we report the NB-only model results.

Table S3: Model estimates for plant source choice experiments.

| <i>Whole-plant assay</i>    | stipples         |                  | eggs             |                  |
|-----------------------------|------------------|------------------|------------------|------------------|
|                             | NB               | ZINB             | NB               | ZINB             |
| Constant ( $\alpha_0$ )     | 1.777 (0.393)**  | 1.927 (0.412)**  | 1.079 (0.476)*   | 1.285 (0.802)    |
| Leaf position ( $\beta$ )   | -0.179 (0.035)** | -0.184 (0.036)** | -0.432 (0.075)** | -0.430 (0.075)** |
| Plant source ( $\alpha_1$ ) | -1.158 (0.404)** | -1.127 (0.406)** | -1.484 (0.470)** | -1.469 (0.469)** |
| Cage ( $\sigma_1^2$ )       | 0.323            | 0.331            | 0.0004           | 0                |
| Plant:Cage ( $\sigma_2^2$ ) | 0.919            | 0.938            | 0.473            | 0.466            |
| AIC                         | 1143.024         | 1144.268         | 386.976          | 388.920          |
| Log Likelihood              | -565.512         | -565.134         | -187.488         | -187.460         |
| Num. obs.                   | 356              | 356              | 356              | 356              |
| Zero inflation: parameter   |                  | 0.138            |                  | 0.200            |
| Zero inflation: SD          |                  | 0.121            |                  | 0.589            |
| <i>Detached leaf assay</i>  |                  |                  |                  |                  |
| Constant ( $\alpha_0$ )     | 2.177 (0.761)**  | 2.273 (0.770)**  | 0.856 (0.811)    | 1.433 (0.718)*   |
| Leaf position ( $\beta$ )   | 0.034 (0.048)    | 0.034 (0.049)    | 0.019 (0.053)    | 0.009 (0.047)    |
| Plant source ( $\alpha_1$ ) | -1.743 (0.286)** | -1.770 (0.291)** | -0.567 (0.304)   | -0.368 (0.305)   |
| Cage ( $\sigma_1^2$ )       | 1.35             | 1.135            | 0.561            | 0                |
| AIC                         | 395.818          | 397.554          | 280.105          | 281.934          |
| Log Likelihood              | -192.909         | -192.777         | -135.052         | -134.967         |
| Num. obs.                   | 60               | 60               | 60               | 60               |
| Num. groups: cage           | 15               | 15               | 15               | 15               |
| Zero inflation: parameter   |                  | 0.000            |                  | 0.217            |
| Zero inflation: SD          |                  | 0.000            |                  | 0.103            |

\*\*\* $p < 0.001$ , \*\* $p < 0.01$ , \* $p < 0.05$

### 3 Herbivore choice tests II: Effects of light and temperature.

The NB model structures for this set of choice experiments were similar to those described in above except for an expanded random effects structure. All models described below are NB-only GLMMs; ZINB models will not be evaluated further in this section. The choice trials in 2014 and 2015 were

conducted slightly differently, which means that each year's data calls for slightly different random effects. We present the analyses of each dataset separately, then jointly.

### 3.1 2014 Trials

The 2014 field and lab trials were conducted in two temperature environments simultaneously, with one cage held in each. This gives a structure of temperature environment ( $\gamma_{(lk)}$ ,  $n = 2$ ) nested within trial ( $\gamma_l$ ,  $n = 6$  each for the 2014 field and lab assays). Nested within temperature environment is cage, but since we have only a single level of cage for each temperature environment per trial, this level is irrelevant for the 2014 dataset. However, we include side-of-cage ( $\gamma_{(kj)}$ ,  $n = 2$ ; left or right, arbitrarily) to control for pseudo-replication at the level of the main treatment effect (i.e. Light environment, light versus dark), which was applied with randomization to the sides of each cage. Each random effect is  $\sim N(0, \sigma_i^2)$ . The full model is given below using the above notation for the random effects. The number of independent data points in the 2014 field and lab trials is 24 each (2 sides per cage, 1 cage per trial, 2 temperature settings per trial, and 6 trials).

$$\log(\mu_{ijkl}) = \begin{cases} \alpha_0 + \alpha_{1,i} + \alpha_{2,i} + \alpha_{12} + \beta x_i + \gamma_l + \gamma_{(lk)} + \gamma_{(kj)}, & \text{if Light = light \& Temp = warm} \\ \alpha_0 + \alpha_{1,i} + \alpha_{2,i} + \beta x_i + \gamma_l + \gamma_{(lk)} + \gamma_{(kj)}, & \text{otherwise.} \end{cases} \quad (8)$$

We set the first levels of coefficients for the fixed effects of Light ( $\alpha_{1,1} = \text{dark}$ ) and Temperature ( $\alpha_{2,1} = \text{cool}$ ) equal to zero since these two states are incorporated into the Constant ( $\alpha_0$ , i.e. the reference level of the model). Our experiment was designed to allow us to fit an interaction term  $\alpha_{12}$  which estimates how much the effect of Light is impacted by the Temperature environment (thus  $\alpha_{12}$  has a single level). NB models were estimated using R package *lme4* [1]. We fit models with the same structure for field and laboratory trials.

### 3.2 2015 Trials

In the 2015 trials, we used bittercress leaves collected from both sun and shade habitats, and our randomization scheme ensured equal representation of sun- and shade-derived leaves across all treatments. We did this to test whether *S. nigrita* would exhibit preference for shade-derived bittercress in the context of our temperature and light manipulations. In our analysis, we included leaf source (sun v. shade) as an additional fixed factor. Our model structure was thus

$$\log(\mu_{ijkl}) = \begin{cases} \alpha_0 + \alpha_{1,i} + \alpha_{2,i} + \alpha_{12} + \alpha_{3,i} + \beta x_i + \gamma_l + \gamma_{(lk)} + \gamma_{(kj)}, & \text{if Light = light \& Temp = warm} \\ \alpha_0 + \alpha_{1,i} + \alpha_{2,i} + \alpha_{3,i} + \beta x_i + \gamma_l + \gamma_{(lk)} + \gamma_{(kj)}, & \text{otherwise.} \end{cases} \quad (9)$$

All coefficients are as in the 2014 trials above, except that the term  $\alpha_{3,i}$  is for source habitat, and the first level ( $\alpha_{3,1} = \text{shade}$ ) was set to 0 and was thus incorporated into the intercept term  $\alpha_0$ . Thus, this model estimates only a single coefficient for the effect of habitat.

The experimental procedures also differed slightly in 2015. We placed two cages in one environmental chamber which was set to a single temperature per trial, and individual trials were conducted at different temperatures sequentially. This implies a structure of cage ( $\gamma_{kl}$ ,  $n = 2$ ) nested within trial ( $\gamma_l$ ,  $n = 5$ ), along with the side-of-cage nested within cage ( $\gamma_{(kj)}$ ,  $n = 2$ ). The number of independent data points in the 2015 trials is thus 40 (2 sides per cage, 2 cages per room, 10 trials [5 in each temperature regime]). While the model structure is the same as in Eqn. 8, the meaning of the random effects (and their coding in the design matrix) are slightly different. Below we discuss how we reconciled the random effects to analyze both years' data together.

### 3.3 Combined 2014-2015 Analysis

We reconcile the slight distinctions between 2014 and 2015 datasets by including trial-year as a composite random effect, now re-coded to reflect each experiment conducted in a given room (compared to a trial containing two separate temperature settings, as in the 2014-only analysis). Nested within the new trial factor is cage, which has  $n = 1$  for 2014 and  $n = 2$  for 2015; side-of-cage is modeled in the same way as above. This model structure is now identical to Eqn. 8.

For the combined analysis, we drop the term for plant source habitat ( $\alpha_3$ ) since the 2014 trials were not designed to examine plant source habitat. Additionally, we model both a continuous and discrete versions of the Temperature factor: the discrete model is the same as Eqn. 8, while in the continuous form,  $\alpha_{2,j}$  is replaced with  $\beta_2 y_j$ , where  $y_j$  is the temperature measured at the level of cage for each trial separately (Appendix B, Fig. 2C). Additionally, the fixed interaction term  $\alpha_{12}$  is now replaced with an interaction modeled by the expression  $\beta_3 y_j (\alpha_{1,i})$ , which captures how the effect of light ( $\alpha_{1,i}$ ) changes as a function of cage temp ( $y_j$ ); since  $\alpha_{1,i}$  has one level (the first level is set to 0), estimating this interaction term  $\beta_3$  adds only a single parameter to the model. The full model is thus:

$$\log(\mu_{ijkl}) = \alpha_0 + \alpha_{1,i} + \alpha_{2,i} + \beta_1 x_i + (\beta_2 + \beta_3 \alpha_{1,i}) y_j + \gamma_l + \gamma_{(lk)} + \gamma_{(kj)} \quad (10)$$

Because the full model with the continuous temperature interaction term ( $\beta_3$ ) exhibited such a poor fit to the data as judged by AIC (see below), we report the coefficient estimates for the nested model containing only the additive effect of the continuous temperature term ( $\beta_2$ ; Table S4).

### 3.4 Model Selection

In the main text, we report the results from the NB GLMMs fit to the 2014 and 2015 datasets (separately) using **R** package lme4. The full results for the combined analysis is displayed below (Table S4). For the 2014 and 2015 datasets, we also analyzed a series of nested models to evaluate the relative performance of simpler nested models (Table S5-S7). We calculated AIC and also performed likelihood ratio tests (not shown, but can be calculated from reported log likelihoods), which agreed with  $\Delta$ AIC results. Additionally, we evaluated overall model fit for the fixed effects-only portion with  $R_{GLMM}^{2(M)}$  and for all model terms combined with  $R_{GLMM}^{2(C)}$  using which were calculated as derived in [6] using **R** package piecewiseSEM [4]. The models reported in the main text are not typically the best model as judged by AIC. Nonetheless, we report the more complex models in the main text

Table S4: Coefficient estimates for all light-temp choice experiments.

|                                   | Stipples             |                     |                     |                     | Eggs                |                      |
|-----------------------------------|----------------------|---------------------|---------------------|---------------------|---------------------|----------------------|
|                                   | Field (2014)         | Lab (2014)          | Lab (2015)          | Both years (1)      | Both years (2)      | Lab (2015)           |
| <i>Fixed effects</i>              |                      |                     |                     |                     |                     |                      |
| $\alpha_0$ (Constant)             | -2.038***<br>(0.603) | -2.514**<br>(0.870) | 0.364<br>(0.885)    | -1.147<br>(0.661)   | -4.123<br>(2.162)   | -4.870***<br>(0.812) |
| $\beta_1$ leaf width (mm)         | 0.068***<br>(0.012)  | 0.063*<br>(0.026)   | -0.003<br>(0.022)   | 0.033<br>(0.018)    | 0.031<br>(0.017)    | 0.054**<br>(0.019)   |
| $\alpha_1$ , [light]              |                      | 1.792*<br>(0.838)   | 2.160***<br>(0.515) | 2.019***<br>(0.470) | 2.321***<br>(0.339) | 3.598***<br>(0.537)  |
| $\alpha_2$ [warm]                 |                      | 0.399<br>(0.885)    | -0.100<br>(0.880)   | 0.109<br>(0.667)    |                     | 1.960**<br>(0.650)   |
| $\alpha_{12}$ [light:warm]        |                      | 1.123<br>(1.172)    | 0.293<br>(0.718)    | 0.636<br>(0.654)    |                     | -1.994**<br>(0.628)  |
| $\alpha_3$ [sun]                  |                      |                     | -0.291<br>(0.701)   |                     |                     | -0.002<br>(0.19)     |
| $\beta_2$ [temp]                  |                      |                     |                     |                     | 0.149<br>(0.102)    |                      |
| <i>Random effects</i>             |                      |                     |                     |                     |                     |                      |
| $\sigma_{kj}^2$ [trial/cage/side] | 0.559                | 1.397               | 0.720               | 1.102               | 1.129               | 0.152                |
| $\sigma_{lk}^2$ [trial/cage]      | 0.000                | 0.099               | 2.451               | 1.687               | 1.587               | 0.170                |
| $\sigma_l^2$ [trial]              | 0.204                | 0.000               | 0.000               | 0.000               | 0.063               | 0.163                |
| $\sigma_m^2$ [year]               |                      |                     |                     | 0.036               | 0.000               |                      |
| AIC                               | 1152.4               | 874.4               | 2125.7              | 2995.8              | 2993.4              | 861.2                |
| Log Likelihood                    | -567.2               | -428.2              | -1053.9             | -1487.9             | -1487.7             | -421.6               |
| Num. obs.                         | 240                  | 240                 | 398                 | 638                 | 638                 | 398                  |

\*\*\* $p < 0.001$ , \*\* $p < 0.01$ , \* $p < 0.05$

so that the coefficient estimates for all terms are available to the reader; the terms retained in the models with lowest AIC in Tables S5-S7 correspond to those with statistically significant ( $p < 0.05$ ) coefficient estimates in the main text tables.

Table S5: Model comparisons for different fixed effect combinations: 2014.

| Dataset                  | Fixed effects                                        | $R_{GLMM}^{2(M)}$ | $R_{GLMM}^{2(C)}$ | AIC     | $\Delta AIC$ | log Lik |
|--------------------------|------------------------------------------------------|-------------------|-------------------|---------|--------------|---------|
| 2014 Field<br>(stipples) | $\alpha_0$                                           | 0.00              | 0.85              | 1190.05 | 37.98        | -590.03 |
|                          | $\alpha_0, \beta$                                    | 0.31              | 0.91              | 1158.50 | 6.43         | -573.25 |
|                          | $\alpha_0, \beta, \alpha_1$                          | 0.52              | 0.91              | 1152.07 | <b>0.00</b>  | -569.03 |
|                          | $\alpha_0, \beta, \alpha_1, \alpha_2$                | 0.54              | 0.91              | 1152.81 | 0.75         | -568.41 |
|                          | → $\alpha_0, \beta, \alpha_1, \alpha_2, \alpha_{12}$ | 0.58              | 0.90              | 1152.41 | 0.34         | -567.21 |
| 2014 Lab<br>(stipples)   | $\alpha_0$                                           | 0.00              | 0.86              | 888.57  | 15.23        | -439.29 |
|                          | $\alpha_0, \beta$                                    | 0.06              | 0.87              | 883.03  | 9.69         | -435.52 |
|                          | $\alpha_0, \beta, \alpha_1$                          | 0.41              | 0.86              | 873.84  | 0.50         | -429.92 |
|                          | $\alpha_0, \beta, \alpha_2$                          | 0.12              | 0.87              | 883.41  | 10.08        | -434.71 |
|                          | $\alpha_0, \beta, \alpha_1, \alpha_2$                | 0.47              | 0.85              | 873.34  | <b>0.00</b>  | -428.67 |
| →                        | $\alpha_0, \beta, \alpha_1, \alpha_2, \alpha_{12}$   | 0.48              | 0.85              | 874.43  | 1.09         | -428.22 |

Notes:

$\Delta AIC$  is each model minus model with lowest AIC.

→ indicates model reported in main text, Table 3.

Table S6: Model comparisons for different fixed effect combinations: 2015.

| Dataset                | Fixed effects                                                  | $R_{GLMM}^{2(M)}$ | $R_{GLMM}^{2(C)}$ | AIC     | $\Delta AIC$ | log Lik  |
|------------------------|----------------------------------------------------------------|-------------------|-------------------|---------|--------------|----------|
| 2015 Lab<br>(stipples) | $\alpha_0$                                                     | 0.00              | 0.95              | 2140.95 | 19.06        | -1065.48 |
|                        | $\alpha_0, \beta$                                              | 0.00              | 0.95              | 2142.79 | 20.90        | -1065.40 |
|                        | $\alpha_0, \beta, \alpha_1$                                    | 0.28              | 0.95              | 2121.89 | <b>0.00</b>  | -1053.94 |
|                        | $\alpha_0, \beta, \alpha_2$                                    | 0.00              | 0.95              | 2144.78 | 22.89        | -1065.39 |
|                        | $\alpha_0, \beta, \alpha_1, \alpha_2$                          | 0.28              | 0.95              | 2123.88 | 1.99         | -1053.94 |
| →                      | $\alpha_0, \beta, \alpha_1, \alpha_2, \alpha_{12}$             | 0.29              | 0.95              | 2124.47 | 2.59         | -1053.24 |
|                        | $\alpha_0, \beta, \alpha_1, \alpha_2, \alpha_3$                | 0.29              | 0.95              | 2126.26 | 4.37         | -1053.13 |
|                        | → $\alpha_0, \beta, \alpha_1, \alpha_2, \alpha_{12}, \alpha_3$ | 0.28              | 0.95              | 2125.72 | 3.83         | -1053.86 |
| (eggs)                 | $\alpha_0$                                                     | 0.00              | 0.64              | 908.39  | 47.22        | -449.19  |
|                        | $\alpha_0, \beta$                                              | 0.02              | 0.64              | 902.03  | 40.86        | -445.01  |
|                        | $\alpha_0, \beta, \alpha_1$                                    | 0.43              | 0.64              | 867.95  | 6.78         | -426.97  |
|                        | $\alpha_0, \beta, \alpha_2$                                    | 0.05              | 0.65              | 902.43  | 41.26        | -444.21  |
|                        | $\alpha_0, \beta, \alpha_1, \alpha_2$                          | 0.46              | 0.65              | 867.88  | 6.71         | -425.94  |
| →                      | $\alpha_0, \beta, \alpha_1, \alpha_2, \alpha_{12}$             | 0.56              | 0.68              | 861.17  | <b>0.00</b>  | -421.58  |
|                        | $\alpha_0, \beta, \alpha_1, \alpha_2, \alpha_3$                | 0.46              | 0.65              | 869.87  | 8.71         | -425.94  |
|                        | → $\alpha_0, \beta, \alpha_1, \alpha_2, \alpha_{12}, \alpha_3$ | 0.56              | 0.68              | 863.17  | 2.00         | -421.58  |

Notes:

$\Delta AIC$  is each model minus model with lowest AIC.

→ indicates model reported in main text, Table 3.

Table S7: Model comparisons for different fixed effect combinations: 2014–2015 combined

| Dataset                    | Fixed effects                                        | $R_{GLMM}^{2(M)}$ | $R_{GLMM}^{2(C)}$ | AIC     | $\Delta AIC$ | log Lik  |
|----------------------------|------------------------------------------------------|-------------------|-------------------|---------|--------------|----------|
| Combined Lab<br>(Stipples) | $\alpha_0$                                           | 0.00              | 0.93              | 3025.93 | 32.55        | -1506.97 |
|                            | $\alpha_0, \beta_1$                                  | 0.02              | 0.93              | 3022.43 | 29.04        | -1504.21 |
|                            | $\alpha_0, \beta_1, \alpha_1$                        | 0.31              | 0.92              | 2993.43 | 0.04         | -1488.71 |
|                            | $\alpha_0, \beta_1, \alpha_2$                        | 0.02              | 0.93              | 3023.84 | 30.45        | -1503.92 |
|                            | $\alpha_0, \beta_1, \alpha_1, \alpha_2$              | 0.32              | 0.93              | 2994.78 | 1.40         | -1488.39 |
|                            | $\alpha_0, \beta_1, \alpha_1, \alpha_2, \alpha_{12}$ | 0.32              | 0.93              | 2995.84 | 2.46         | -1487.92 |
|                            | $\alpha_0, \beta_1, \alpha_1, \beta_2$               | 0.35              | 0.92              | 2993.38 | <b>0.00</b>  | -1487.69 |
|                            | $\alpha_0, \beta_1, \alpha_1, \beta_2, \beta_3$      | 0.35              | 0.92              | 2994.27 | 0.89         | -1487.14 |

Notes:

$\Delta AIC$  is each model minus model with lowest AIC.

## References

- [1] Douglas Bates, Martin Mächler, Ben Bolker, and Steve Walker. Fitting linear mixed-effects models using lme4. *Journal of Statistical Software*, 67(1):1–48, 2015.
- [2] D. A. Fournier, H. J. Skaug, J. Ancheta, J. Ianelli, A. Magnusson, M.N. Maunder, A. Nielsen, and J. Sibert. AD Model Builder: using automatic differentiation for statistical inference of highly parameterized complex nonlinear models. *Optim. Methods Softw.*, 27:233–249, 2012.
- [3] Simon Jackman. *pscl: Classes and Methods for R Developed in the Political Science Computational Laboratory, Stanford University*. Department of Political Science, Stanford University, Stanford, California, 2015.
- [4] Jonathan S. Lefcheck. piecewissem: Piecewise structural equation modelling in r for ecology, evolution, and systematics. *Methods in Ecology and Evolution*, 7(5):573–579, 2016.
- [5] Tom Loeys, Beatrijs Moerkerke, Olivia De Smet, and Ann Buysse. The analysis of zero-inflated count data: beyond zero-inflated poisson regression. *Br J Math Stat Psychol*, 65(1):163–80, Feb 2012.
- [6] Shinichi Nakagawa and Holger Schielzeth. A general and simple method for obtaining  $r^2$  from generalized linear mixed-effects models. *Methods in Ecology and Evolution*, 4(2):133–142, 2013.
- [7] R Core Team. *R: A Language and Environment for Statistical Computing*. R Foundation for Statistical Computing, Vienna, Austria, 2017.
- [8] Hans Skaug, Dave Fournier, Ben Bolker, Arni Magnusson, and Anders Nielsen. *Generalized Linear Mixed Models using 'AD Model Builder'*, 2016-01-19.
- [9] Achim Zeileis, Christian Kleiber, and Simon Jackman. Regression models for count data in r. *Journal of Statistical Software, Articles*, 27(8):1–25, 2008.
- [10] A. Zuur, E.N. Ieno, N. Walker, A.A. Saveliev, and G.M. Smith. *Mixed Effects Models and Extensions in Ecology with R*. Statistics for Biology and Health. Springer New York, 2009.

# **Appendix S4. Temperature profiles for field and laboratory habitat preference choice tests.**

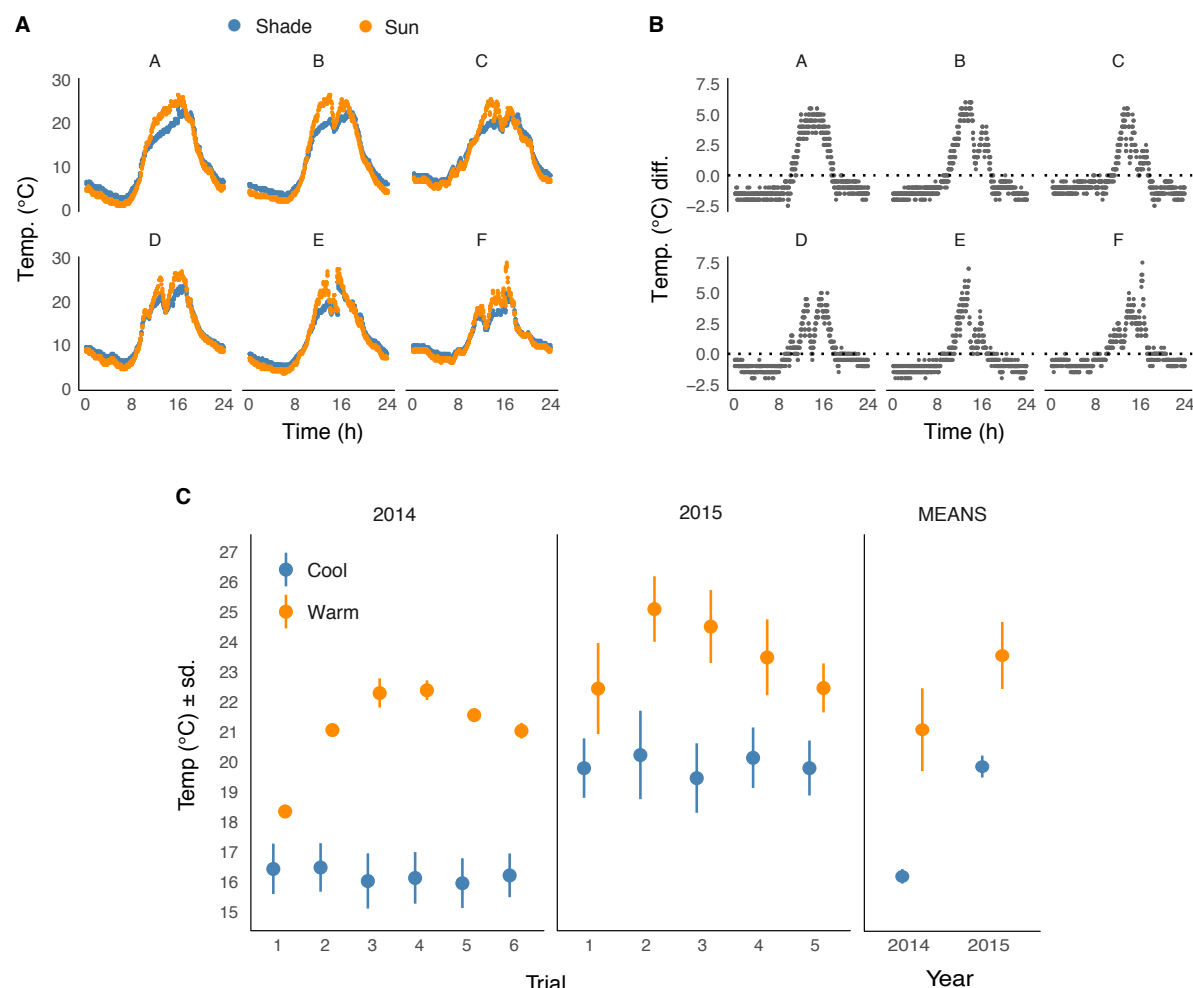

**Fig. S1. Temperature profiles for field and laboratory habitat preference choice tests. (A)** Temperature profiles for field cages (from 2014). Both ‘Sun’ and ‘Shade’ cages were equally masked from natural sunlight but were either sun-exposed or canopy shaded in order to confer different temperature profiles. We collected a full 24 h of temperature data during each trial (ordered in time and labeled A–F), which took place for 24 h beginning at 1100 h. 0 h represents midnight. **(B)** Differences in temperature between sun-exposed and canopy-shaded assay cages (sun – shade), showing a maximal difference of 5 °C in mid-afternoon during each trial. **(C)** Average temperature for each laboratory trial for 2014 and 2015 (left; ordered in time and labeled 1–6), and the mean (right;  $\pm 1$  standard deviation) over all trials for each year. 2014 trials used two environmental chambers, while 2015 trials alternated between warm and cool trials at two-day intervals (see Methods in the main text for details).
